# Supplementary material
Source: publisher figshare collection journal article supplement (https://tandf.figshare.com/ndownloader/files/37565071)
Supplement: Supplementary file 1 [file 37565071]

**Appendix 1.** Summary of the information for select localities of the Cabbage Patch beds where the new sminthid is present. Additional locality information is provided in Calede and Rasmussen (2020:table 1).

| Unit | UWBM Loc. | KU Loc. | UMPC Loc. |
| --- | --- | --- | --- |
| L | -- | Ku-Mt-17 | MV6554 |
| L | C1707 | -- | MV6554-7 |
| L | C1708 | Ku-Mt-25 | MV6558-2 |
| L | C1720 | Ku-Mt-69 | MV6620 |
| L | C1721 | Ku-Mt-70 | MV6621 |
| L | -- | Ku-Mt-15 | MV6558 |
| L | -- | Ku-Mt-22 | MV6613 |
| M | -- | -- | MV6504 |
